# Supplementary figures and images for: An Integrative Multi-Omics Workflow to Address Multifactorial Toxicology Experiments
Source: MDPI journal article supplement (doi:10.3390/metabo9040079), 2019-04-24

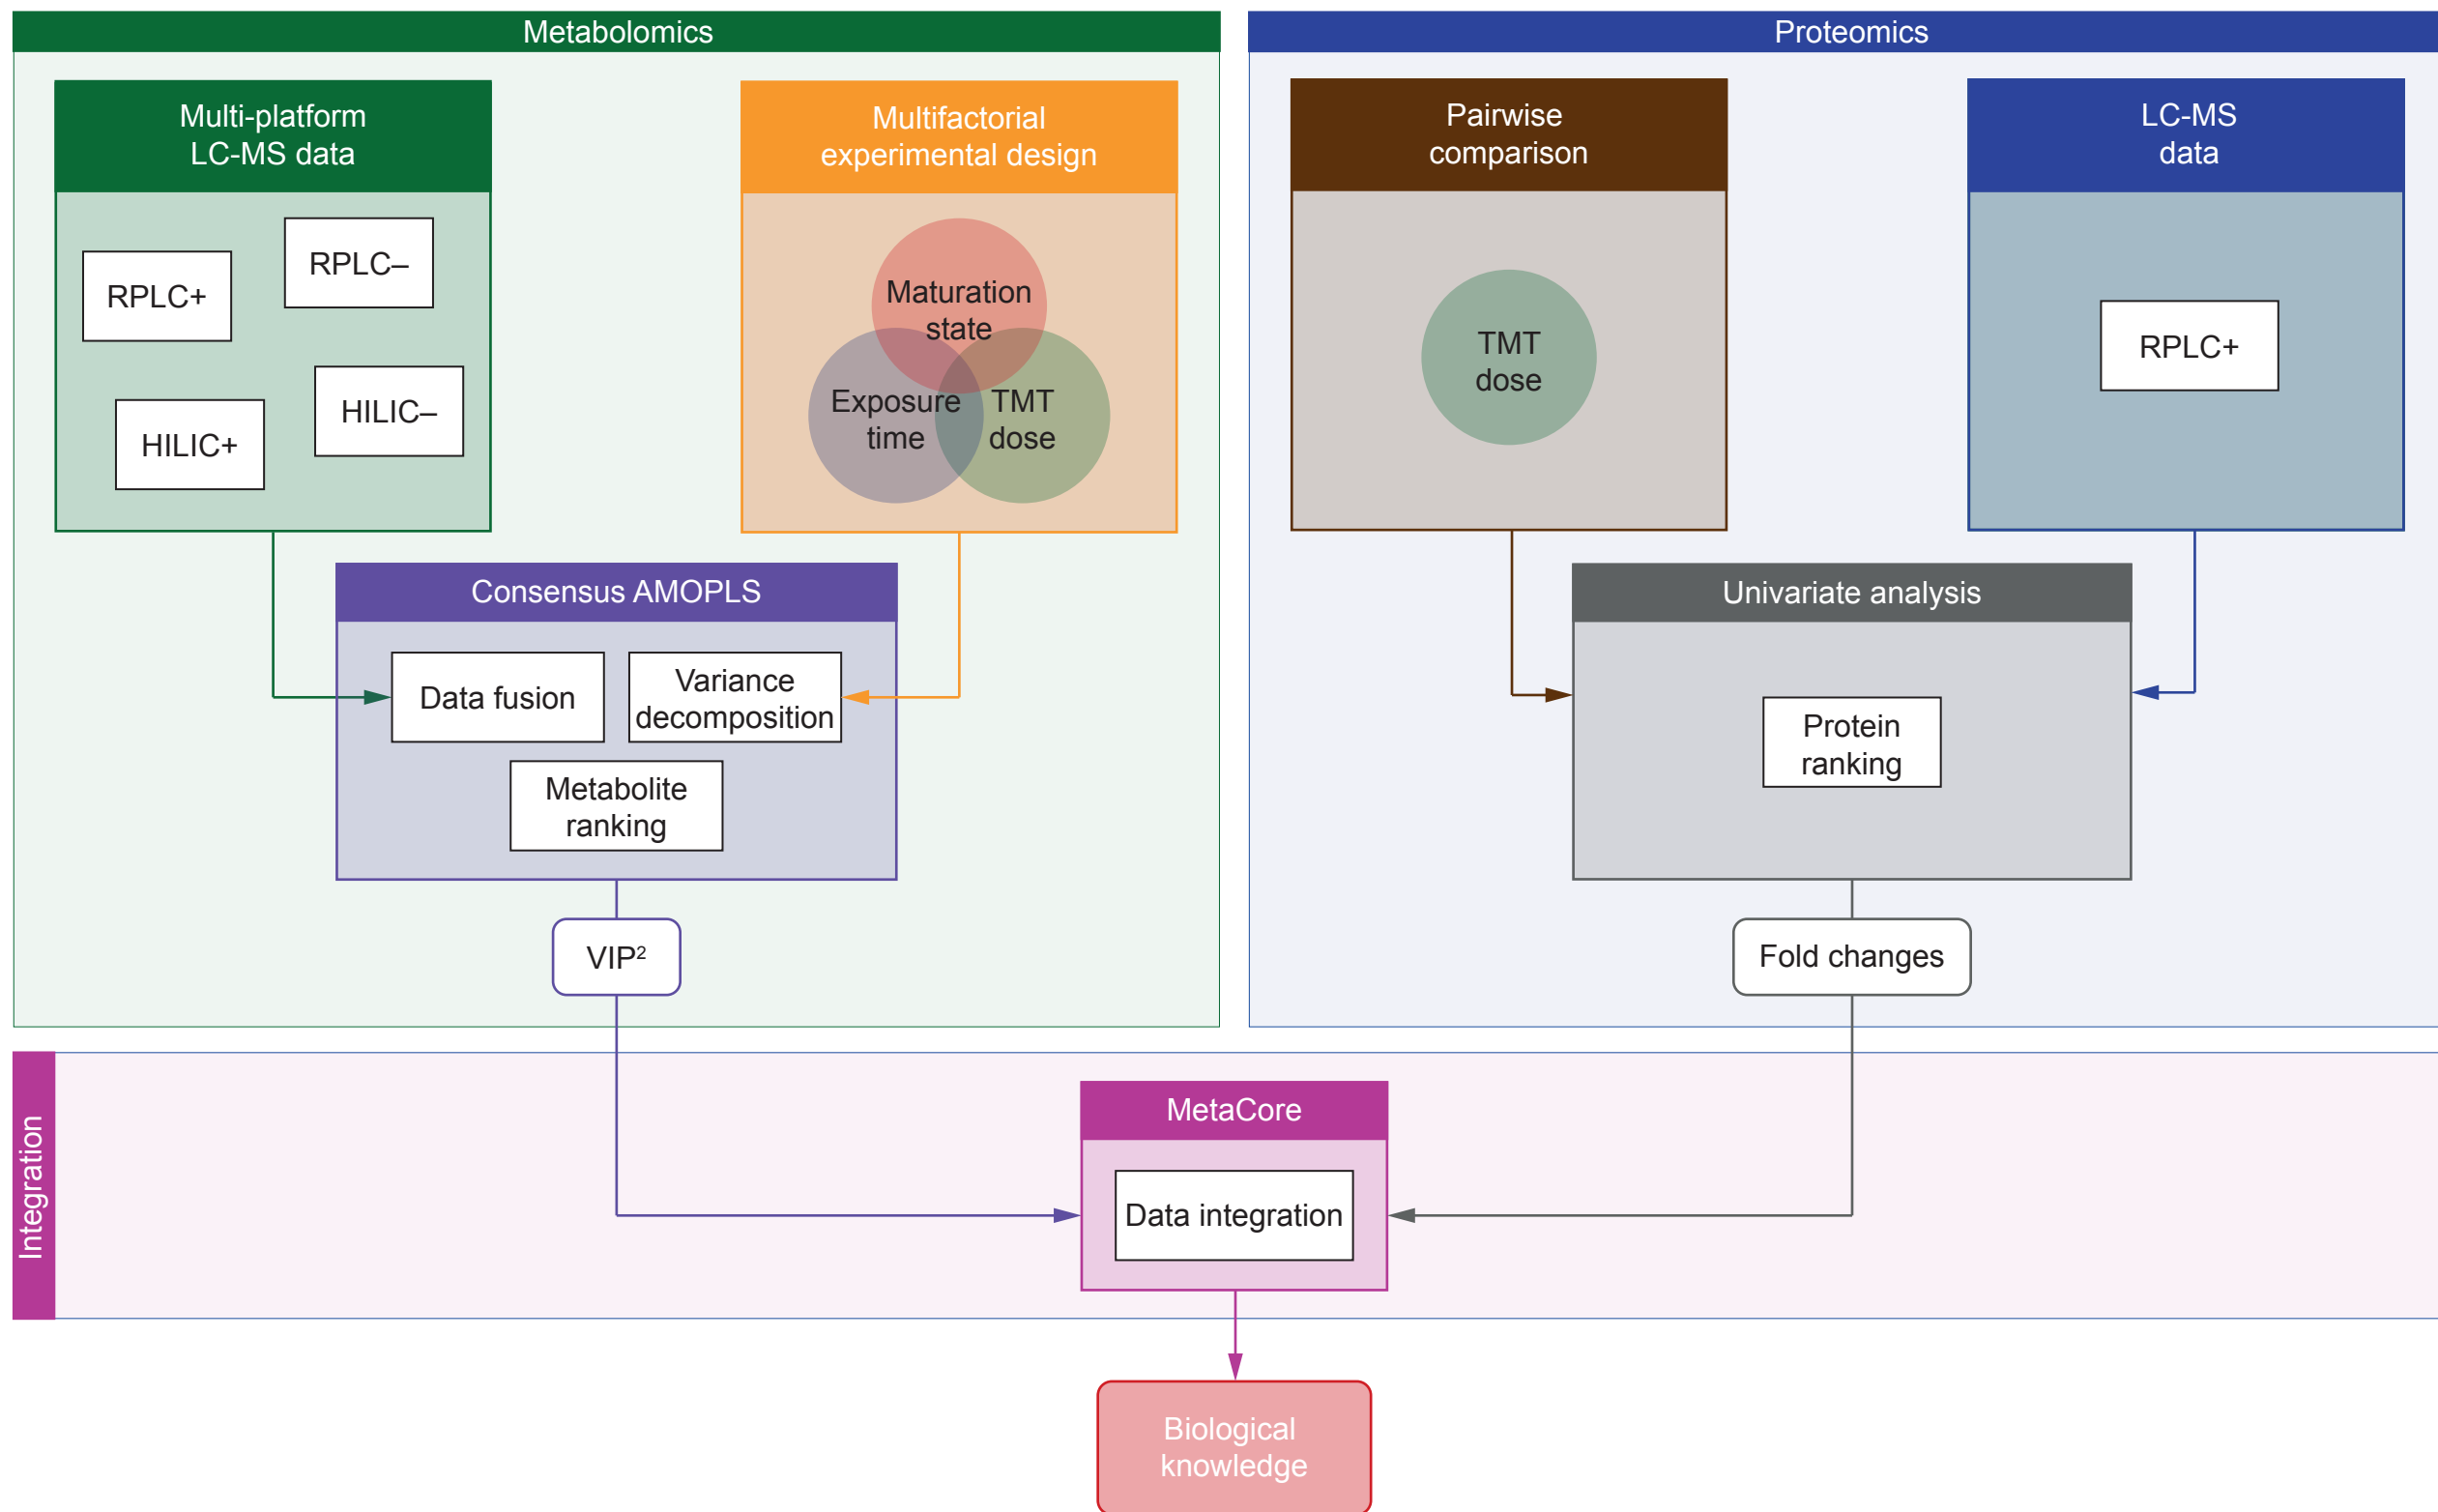

Supplement: s1 [file s1]
